# Supplementary material for: Electrodeposition of Ni–Mo–rGO composite electrodes for efficient hydrogen production in an alkaline medium
Source: Royal Society of Chemistry journal article supplement (doi:10.1039/c7nj04552b), 2018-01-01
Supplement: c7nj04552b1.pdf [file c7nj04552b1.pdf]

## Electrodeposition of Ni-Mo-rGO composite electrodes for efficient hydrogen production in alkaline medium

Sandhya Shetty, M. Mohamed Jaffer Sadiq, D. Krishna Bhat  
and A. Chitharanjan Hegde\*

Department of Chemistry  
National Institute of Technology Karnataka,  
Surathkal, Surathkal - 575025, India

\*E-mail: [acrhegde@gmail.com](mailto:acrhegde@gmail.com),  
Phone: +91-9980360242, Fax: 0824-2474033

### Supplementary Information

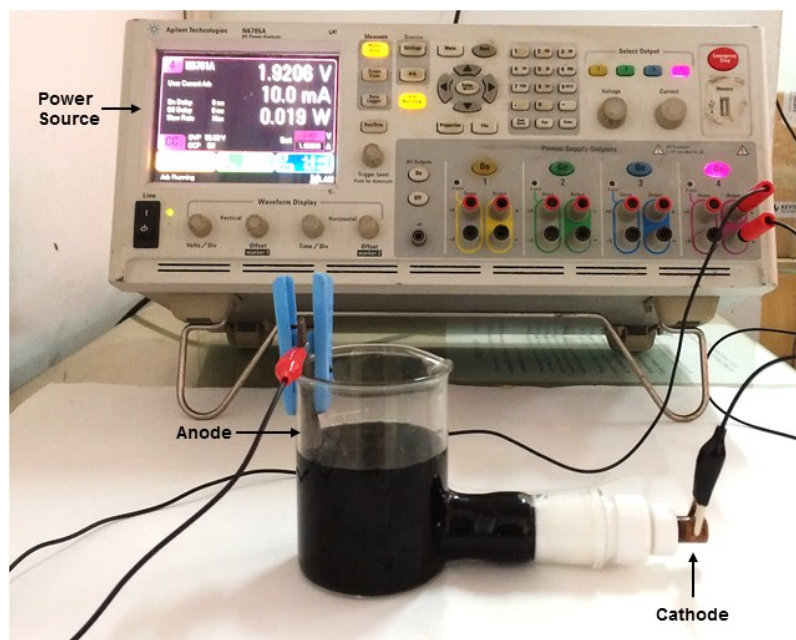

Fig. S1 Customized glass cell used for electrodeposition of Ni-Mo-rGO composite coatings from the electrolyte

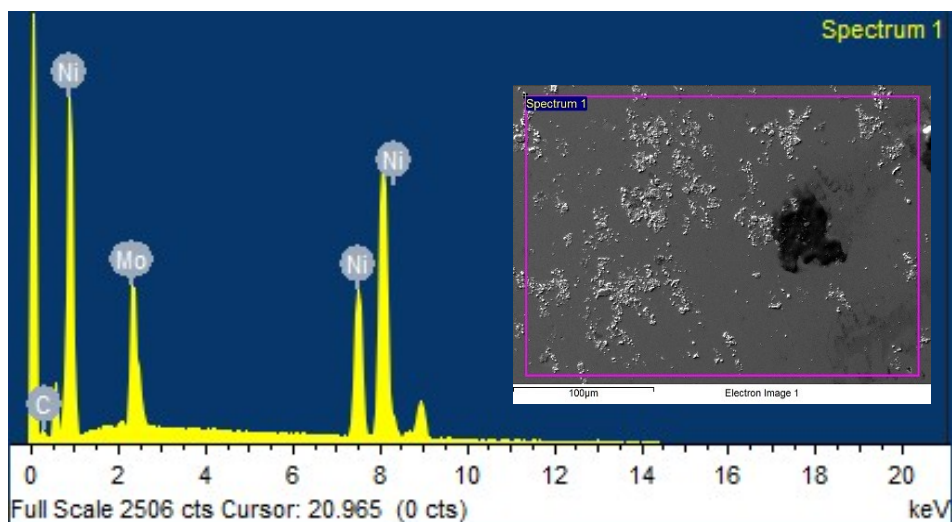

Fig. S2 EDX spectrum of the Ni–Mo–rGO composite coating developed at  $1.0 \text{ A dm}^{-2}$  showing the peaks for Ni, Mo, and C

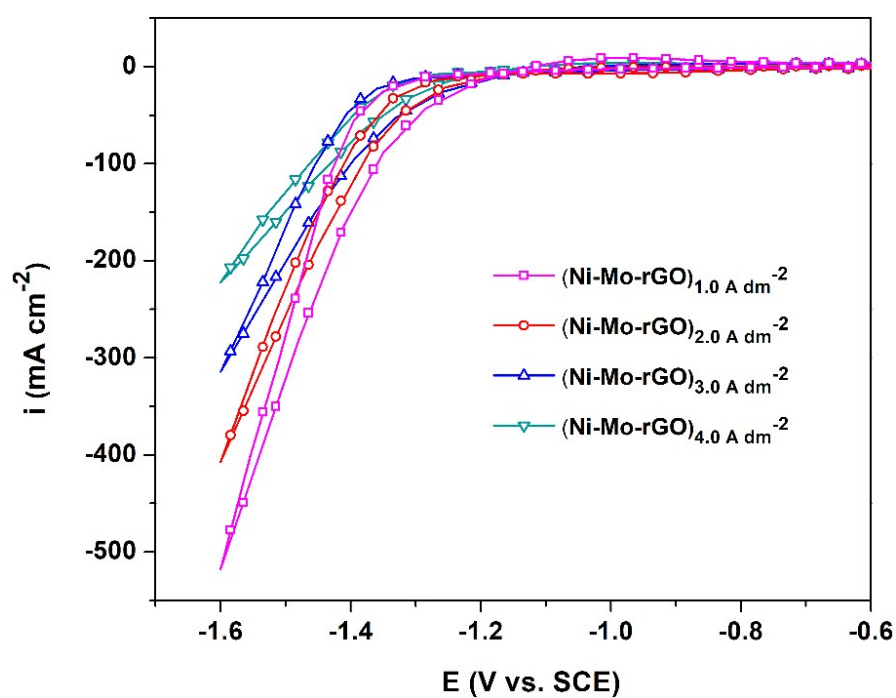

Fig. S3 Cyclic voltammograms of Ni–Mo–rGO coatings deposited at different c.d.'s showing their cathodic peak current density,  $i_{pc}$  for HER

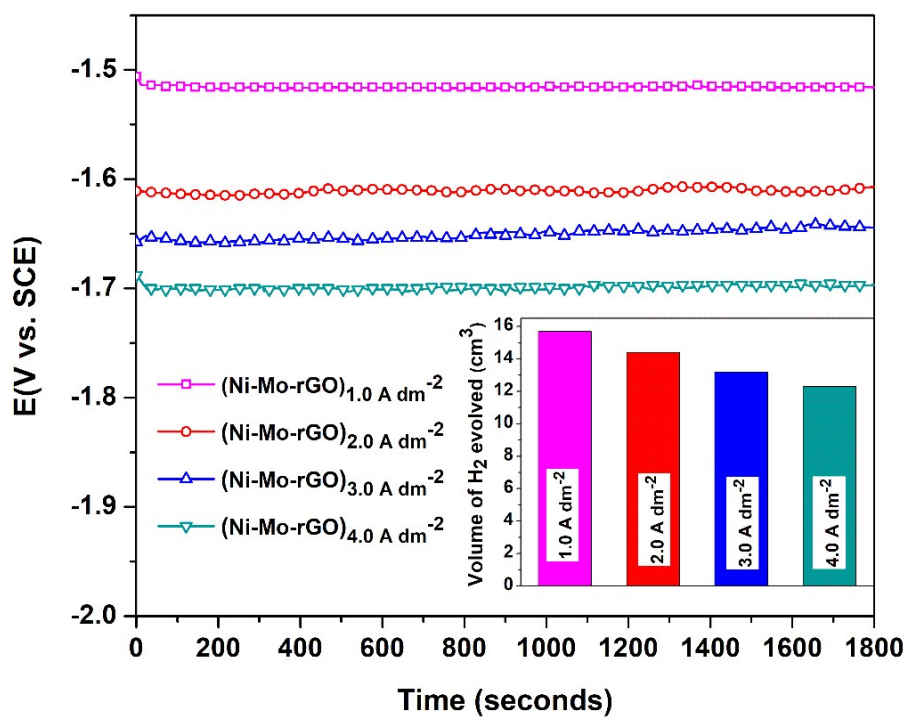

Fig. S4 Chronopotentiograms of Ni–Mo–rGO composite coatings, deposited at different c.d.’s under impressed cathodic current of  $-300 \text{ mA cm}^{-2}$  with the volume of  $\text{H}_2$  evolved in 300 s on each test electrodes are shown in the inset
